# Supplementary material for: Antarctic temperature and CO 2 : near-synchrony yet variable phasing during the last deglaciation
Source: Copernicus journal article supplement (doi:10.5194/cp-15-913-2019), 2019-05-22
Supplement: Supplementary file 1 [file leadlagtable.xlsx]

## Sheet: Sheet1
ATS3 8 pts	95 % (lower)	68 % (lower)	Maximum	68 % (upper)	95 % (upper)		ATS3 7 pts	95 % (lower)	68 % (lower)	Maximum	68 % (upper)	95 % (upper)		Test of Holocene CO2 : only end of rapid rise, 8 pts.	95 % (lower)	68 % (lower)	Maximum	68 % (upper)	95 % (upper)
T1 Onset	-338.203	126.544	570	750.591	1045.42		T1 Onset	-226.451	246.743	609	801.666	1073.27		Holocene	-71	65	174	280	411
ACR Onset	-356.581	-137.26	50	376.355	708.481		ACR Onset	-268.835	2.68528	240	501.926	781.164
ACR End	-410.292	-211.498	-65	117.042	374.72		ACR End	-455.848	-230.405	-56	136.791	362.579
Holocene	44.721	336.679	532	629.301	773.311		Holocene	84.5618	345.063	520	622.669	763.481
WD d18O 8 pts	95 % (lower)	68 % (lower)	Maximum	68 % (upper)	95 % (upper)
T1 Onset	-439.231	-36.144	210	386.587	636.499
ACR Onset	-377.893	-213.012	-150	231.305	501.717
ACR End	-276.69	-89.1178	35	206.431	545.109
Holocene	78.8057	584.685	805	854.44	949.47
DF d18O 8 pts	95 % (lower)	68 % (lower)	Maximum	68 % (upper)	95 % (upper)
T1 Onset	-512.506	-1.55742	480	728.523	1054.46
ACR Onset	-573.012	-245.791	48	345.489	705.993
ACR End	-463.599	-250.737	-108	208.943	489.669
Holocene	-293.366	-25.4811	96	408.029	616.876
EDC d18O 8 pts	95 % (lower)	68 % (lower)	Maximum	68 % (upper)	95 % (upper)
T1 Onset	-307.527	135.611	460	665.322	953.048
ACR Onset	-383.849	-128.686	-20	343.71	643.476
ACR End	-482.542	-298.782	-175	-3.75251	360.225
Holocene	71.4577	331.046	492	575.219	696.901
TD d18O 8 pts	95 % (lower)	68 % (lower)	Maximum	68 % (upper)	95 % (upper)
T1 Onset	-320.705	195.862	598	799.724	1086.66
ACR Onset	-336.207	-159.221	10	337.604	658.449
ACR End	-496.179	-307.092	-174	22.6937	403.234
Holocene	70.4803	332.184	560	629.786	762.233
EDML d18O 8 pts	95 % (lower)	68 % (lower)	Maximum	68 % (upper)	95 % (upper)
T1 Onset	-393.116	53.3109	330	589.67	917.331
ACR Onset/ 16 ka ??	-1564.55	-866.406	-518	1068.21	1885.24	Note that the point in EDML doesn't correspond well with either change !
ACR End	-410.099	-203.761	-48	143.05	389.563
Holocene	-26.9534	337.507	552	678.61	843.838

## Sheet: Sheet2
Timings and % uncertainties													Timings and % uncertainties
8 pts	ATS						CO2						7 pts	ATS						CO2
	-95	-68	Max	68	95		-95	-68	Max	68	95			-95	-68	Max	68	95		-95	-68	Max	68	95
T1 onset	17467.1	17706.1	18093	18218.4	18425.8		17168.5	17359.4	17581.9	17689.3	18098.3		T1 onset	17577.9	17898.2	18136.8	18259.3	18435.8		17185.1	17358.8	17574.5	17696.3	18200.1
ACR onset	14068.5	14214.5	14238.5	14521.6	14699.2		13755.8	14019.3	14563.5	14446.8	14561.2		ACR onset	14112.4	14227.9	14232.5	14531.4	14704.1		13727.2	13891.7	14216.5	14320.2	14543.9
ACR end	12582.9	12690.9	12783.2	12904.1	13118		12558.9	12727.9	12828.5	12961.8	13126.7		ACR end	12592	12697.8	12788.7	12901.5	13057.7		12535	12690.2	12901.4	12995.1	13196.4
T1 end	11384	11568.1	11695	11759.5	11877.2		11010.6	11071.7	11147.9	11265.6	11534		T1 end	11445.1	11570.5	11673.1	11753.3	11861.5		11009	11070.3	11149.6	11267.1	11533.7
Timings and % uncertainties
8 pts	WD
	-95	-68	Max	68	95
T1 onset	17525.1	17604.4	17689.7	17809.1	17970.7
ACR onset	14112.7	14203.8	14240.9	14305.1	14386.5
ACR end	12739.2	12837.9	12878.7	12958.8	13435.7
T1 end	11691.1	11817.2	11999.1	11986.4	11997.5
Timings and % uncertainties
8 pts	DF
	-95	-68	Max	68	95
T1 onset	17141.2	17609.2	17598.5	18223.2	18447.8
ACR onset	13789.3	14046.4	14353.7	14530.6	14751.3
ACR end	12522.1	12626.8	12689.9	13025	13242.5
T1 end	11027.9	11169.3	11225.9	11552.8	11748.3
Timings and % uncertainties
8 pts	EDC
	-95	-68	Max	68	95
T1 onset	17493.2	17769.8	17945.3	18118.1	18326.8
ACR onset	14044.2	14245.3	14384.4	14450.3	14586.8
ACR end	12534.7	12619.9	12667.7	12763.7	13264.7
T1 end	11484.9	11562.8	11585.9	11698.1	11782.8
Timings and % uncertainties
8 pts	TD
	-95	-68	Max	68	95
T1 onset	17387.6	17824.3	18075.9	18278.5	18451.4
ACR onset	14141.6	14204.4	14229.3	14481.5	14628.5
ACR end	12518	12594.2	12664.1	12811.5	13254.8
T1 end	11395.3	11561.4	11722.9	11751.2	11871.8
Timings and % uncertainties
8 pts	EDML
	-95	-68	Max	68	95
T1 onset	17461.1	17678.4	17870.9	18052.1	18303.2
ACR onset/16 ka event ???	14281.4	14899.7	16013.3	15790.6	16386.7
ACR end	12572	12695.4	12757.4	12943	13124.7
T1 end	11176.1	11575.9	11675	11821	11954.4

## Sheet: Sheet3
Timings and % uncertainties
7 pts	WD
	-95	-68	Max	68	95
T1 onset	17523	17617	17676	17875	18075
ACR onset	14103	14203	14305	14333	14386
ACR end	12770	12848	12884	12965	13437
T1 end	11757	11812	11999	11980	11997
Timings and % uncertainties
7 pts	DF
	-95	-68	Max	68	95
T1 onset	17452	17710	17620	18231	18436
ACR onset	13947	14152	14352	14525	14743
ACR end	12524	12619	12692	12953	13183
T1 end	11043	11176	11225	11526	11651
Timings and % uncertainties
7 pts	EDC
	-95	-68	Max	68	95
T1 onset	17546	17798	17943	18094	18267
ACR onset	14205	14339	14438	14496	14603
ACR end	12539	12631	12688	12786	13019
T1 end	11458	11558	11606	11700	11790
Timings and % uncertainties
7 pts	TD
	-95	-68	Max	68	95
T1 onset	17561	17860	18112	18247	18439
ACR onset	14140	14196	14233	14406	14553
ACR end	12516	12584	12664	12770	12995
T1 end	11523	11632	11716	11762	11857
Timings and % uncertainties
7 pts	EDML
	-95	-68	Max	68	95
T1 onset	17577	17714	17838	17956	18145
ACR onset/16 ka event ???	14885	14959	15394	15623	16009
ACR end	12622	12729	12855	12914	13040
T1 end	11299	11602	11670	11806	11934
