# Supplementary material for: Antarctic temperature and CO 2 : near-synchrony yet variable phasing during the last deglaciation
Source: Copernicus journal article supplement (doi:10.5194/cp-15-913-2019), 2019-05-22
Supplement: Supplementary file 2 [file cp-15-913-2019-supplement.zip]

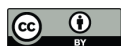

## *Supplement of*

# **Antarctic temperature and CO<sub>2</sub>: near-synchrony yet variable phasing during the last deglaciation**

**Jai Chowdhry Beeman et al.**

*Correspondence to:* Frédéric Parrenin ([frederic.parrenin@univ-grenoble-alpes.fr](mailto:frederic.parrenin@univ-grenoble-alpes.fr))

- [cp-15-913-2019-supplement-title-page.pdf](#)
- [supplement](#)
  - [leadlagtable.xlsx](#)
  - [supplement.pdf](#)

The copyright of individual parts of the supplement might differ from the CC BY 4.0 License.
