# Supplementary material for: Antarctic temperature and CO 2 : near-synchrony yet variable phasing during the last deglaciation
Source: Copernicus journal article supplement (doi:10.5194/cp-15-913-2019), 2019-05-22
Supplement: Supplementary file 3 [file cp-15-913-2019-supplement.zip]

Archive with 4 entries (3 files):
- cp-15-913-2019-supplement-title-page.pdf
- supplement/
- supplement/leadlagtable.xlsx
- supplement/supplement.pdf
